# Supplementary material for: Neutral nido-heteroboranes with non ionisable hydrogen as arenes in coordination
Source: Royal Society of Chemistry journal article supplement (doi:10.1039/b307027a), 2003-01-01
Supplement: b307027a.doc [file b307027a.doc]

#### Experimental section

# Instrumentation

IR spectra were recorded with KBr pellets on a FTIR-8300 Shimadzu spectrophotometer. 1H-NMR (300.13 MHz), 13C{1H}-NMR (75.47 MHz) and 11B and 11B{1H}-NMR (96.29 MHz) spectra were recorded at room temperature with a Bruker ARX 300 instrument equipped with the appropriate decoupling accessories. Chemical shift values for 1H, and 13C{1H} NMR spectra were referenced to Si(CH3)4, and those for 11B and 11B{1H} NMR spectra were referenced to (C2H5)2OBF3. Chemical shifts are reported in parts per million downfield from Si(CH3)4 and coupling constants in hertz.

**Materials**

1,2-C2B10H12 **(***Katchem Ltd.*), methyl iodide (*Panreac*), HBF4 (8 M solution in water, *Fluka*) and dimethylsulfide (*Aldrich)* were used as received without further purification. Diethyl ether was freshly distilled from sodium benzophenone. Other solvents were of reagent grade purity and were used without further purification and stored over molecular sieves.*Closo* 1-SH-1,2-C2B10H11 and[RhCl(cod)]2 were prepared according to literature methods.[[1]](#endnote-2),[[2]](#endnote-3) Experiments were carried out under dry, oxygen-free dinitrogen atmosphere, using standard Schlenck techniques, with some subsequent manipulation in the open laboratory.

**Synthesis of 1-SMe-1,2-C2B10H11.**

To a two-necked round-bottom flask (25 mL) fitted with a dinitrogen inlet/outlet, containing deoxygenated methanol (10 mL), was added KOH (190.7 mg, 3.40 mmol) and 1-SH-1,2-C2B10H11 (600 mg, 3.40 mmol). After cooling to room temperature, methyl iodide (570 mg, 4.01 mmol) was added to the resulting solution. After 5 minutes, the solvent was evaporated in a vacuum. To the residue were added diethyl ether (10 mL) and aqueous 0.5 M KOH (10 mL). The layers were separated, and the organic extracts were washed with aqueous 0.5 M KOH (3  10 mL), dried, and evaporated in a vacuum. 11B{1H} NMR (CD3COCD3):  –1.8 (1B), –5.2 (1B), –9.3 (4B), –12.2 (4B).

**Synthesis of [K][7-SMe-7,8-C2B9H11].**

To a two-necked round-bottom flask (25 mL) fitted with a dinitrogen inlet/outlet, containing deoxygenated methanol (10 mL), was added KOH (1.09 gr, 19.4 mmol). After this was stirred for 30 min at room temperature, a solution of 1-SMe-1,2-C2B10H11 (615 mg, 3.23 mmol) in 5 mL of deoxygenated methanol was added. The reaction mixture was then refluxed for 1 h. Once the mixture cooled, the solvent was evaporated under vacuum. The resulting white residue was treated with water (15 mL) and the excess potassium hydroxide was neutralized with HCl (1 M). The water solution was extracted with diethyl ether (215 mL), and the separated organic phases were combined and washed with water (15 mL), dried, and evaporated in vacuo. 11B{1H} NMR (CD3COCD3):  –9.7 (1B), –10.1 (1B), –14.5 (1B), –16.6 (2B), –17.6 (1B), –21.9 (1B), –32.7 (1B), –36.4 (1B).

**Synthesis of 7-SMe-10-SMe2-7,8-C2B9H10.**

Following the method of Plesek et al.,[[3]](#endnote-4) to a two-necked round-bottom flask (25 mL) containing a cooled

and stirring 1 M aqueous solution of [K][7-SMe-7,8-C2B9H11] (3 mL), were added dropwise SMe2 (746 mg, 12 mmol) in toluene (3 mL) and concd. HCl (1.5 mL). The mixture was vigorously stirred for 5 min to turn slightly orange. After this time, 16% aq. CH3CHO (2.25 mL) was added. After stirring for 4 h, the organic phase was separated and water (4.5 mL) was added. The solution was evaporated at room temperature, and the solid formed was extracted with CHCl3 (5 mL). Purification by column chromatography on silica gel with CHCl3 (RF=0.4) and removal of solvent afforded 7-SMe-10-SMe2-7,8-C2B9H10 as a white solid (592 mg, 82%). 1H NMR (CD3Cl3):  2.57 (s, 3H, S-C*H*3), 2.56 (s, 3H, S-C*H3*), 2.46 (br s, 1H, Cc-*H*), 2.26 (s, 3H, S-C*H*3), –0.92 (br quartet, 1H, B-H-B). 11B NMR (CD3Cl):  –10.5 (s, 1*J*(B, H)= 141, 1B), –11.2 (d, 1*J*(B, H)= 140, 1B), –14.2 (d, 1*J*(B, H)= 168, 1B) –16.8 (d, 1*J*(B, H)= 136, 3B), –21.0 (d, 1*J*(B, H)= 158, 1B), –26.4 (d, 1*J*(B, H)= 28, 1B), –36.2 (d, 1*J*(B, H)= 145, 1B). 13C{1H} NMR (CD3COCD3):  26.45 (S-*C*H3), 19.86 (S-*C*H3). FTIR (KBr), cm-1): 3016 (Cc-H), 2926 (CH3), 2524 (B-H), 1421 (CH3). Anal. Calcd for C5H19B9S2: C, 24.96; H, 7.96; S, 26.65 %. Found: C, 24.56; H, 7.88; S, 25.78 %.

**Synthesis of 7,10-(SMe2)2-7,8-C2B9H9 (1)**

A solution of KOH (218 mg, 3.88 mmol) and MeI (1.4 mL, 22.5 mmol) in methanol (15 mL) was slowly added to a stirring solution of 7-SMe-10-SMe2-7,8-C2B9H10 (606 mg, 2.52 mmol) in 60 mL of methanol. The solution was stirring during 3 hours at room temperature for a while a white fine powder was obtained. The solvent was evaporated. Water (75 mL) was added to the residue and a white insoluble solid was collected by filtration. The solid was gently washed with water, dried in vacuum. Purified by column chromatography (silica gel, CH2Cl2) yielded at RF=0.2 analytical pure compound (**1**) as a white solid (520 mg, 81 %). 1H NMR (CD3COCD3):  2.85 (s, 3H, S-C*H*3), 2.77 (s, 3H, S-C*H3*), 2.49 (s, 3H, S-C*H*3), 2.47 (s, 3H, S-C*H*3), 1.27 (br s, 1H, Cc-*H*). 11B NMR (CD3COCD3):  –11.5 (s, 1B, B(8)), –16.5 (d, 1*J*(B, H)= 129 Hz, 1B), –17.4 (d, 2B) –18.0 (d, 1B), –21.0 (d, 1B), –23.9 (d, 1*J*(B, H)= 172 Hz, 1B), –25.9 (d, 1*J*(B, H)= 166 Hz, 1B), –44.7 (d, 1*J*(B, H)= 139 Hz, 1B). 13C{1H} NMR (CD3COCD3):  29.20 (S-*C*H3), 27.95 (*C*H3). FTIR (KBr), cm-1): 3016 (Cc-H), 2926 (CH3), 2524 (B-H), 1421 (CH3). Anal. Calcd for C6H21B9S2: C, 28.30; H, 8.31; S, 25.18 %. Found: C, 28.07; H, 8.27; S, 24.24 %.

**Synthesis of [2-cod-8,11-(SMe2)2-2,1,8-RhC2B9H9][BF4] ([2][BF4])**

*Method 1.*

To a solution of [Rh(acac)(cod)] (30.5 mg, 98.3 mol) in THF (1 mL) was added HBF4 (13 L, 104 mol). The mixture was stirred during 15 min, then a solution of 7,10-(SMe2)2-7,8-C2B9H9 (25 mg, 98.3 mol) in CH2Cl2 (4 mL) was added. The mixture was stirred at room temperature for one h and then was refluxed for 30 min. A pale solid precipitated. The volume of the reaction mixture was reduced to aprox. 1mL followed by the addition of 10 mL of CHCl3. The reaction mixture was cooled to 0 ºC before filtration to get a green-yellowish solid. Rinsing with CHCl3 and drying in vacuum affords 48.8 mg (90 %) of **[2][BF4]**.

*Method 2.*

When a solution of [RhCl(cod)]2 (24.2 mg, 49.2 mol) and AgBF4 (19.1 mg, 98.3 mol) in CHCl3 (3 mL) was added to a solution of 7,10-(SMe2)2-7,8-C2B9H9 (25 mg, 98.3 mol) in CHCl3/CH2Cl2 (1:1) (4 mL) a green solid was obtained from the yellow solution. The suspension was stirred for 15 min and the solid was filtrated, washed with THF and CHCl3 and dried in vacuum to yield compound **[2][BF4]** (49.3 mg, 91 %). 1H NMR (CD3COCD3):  4.83-4.71 (m, 2H, C*H*), 4.65-4.53 (m, 2H, C*H*), 3.16 (s, 3H, S-C*H*3), 3.13 (s, 3H, S-C*H*3), 3.01 (s, 3H, S-C*H*3), 2.71 (s, 3H, S-C*H*3), 2.67-2.56 (m, 4H, C*H*2), 2.49-2.23 (m, 4H, C*H*2). 11B NMR (CD3COCD3):  –0.2 (1B, BF4), –0.5 (s, 1B, B(8)), –9.0 (d, 1J(B,H)=131, 1B), –11.6 (2B), –13.5 (1B), –15.1 (d, 1J(B,H)=141, 1B), –21.9 (d, 1J(B,H)=162, 1B), –23.2 (d, 1J(B,H)=133, 2B). 13C{1H} NMR (CD3COCD3):  83.83 (*C*H), 81.68 (*C*H), 33.31 (*C*H2), 30.81 (*C*H2), 26.99 (S-*C*H3), 25.06 (S-*C*H3). FTIR (KBr), cm-1): 3016 (Cc-H), 2941 (CH3), 2870, 2830 and 2810 (CH), 2524 (B-H), 1429 (CH3), 1083-1030 (B-F). Anal. Calcd for C14H33B10F4RhS2·0.5CHCl3: C, 28.45; H, 5.52; S, 10.48 %. Found: C, 28.46; H, 5.66; S, 10.30 %.

* Comments on method 2 : an attempt to avoid isomerization of the carborane cage by performing method 2 at low temperature (CHCl3/N2 bath = –63 ºC) yielded the same product.

1. F. Teixidor, C. Viñas, R. Benakki, R. Kivekäs, R. Sillanpää, *Inorg. Chem.*, 1997, **36**, 1719. [↑](#endnote-ref-2)
2. D. F. Schriver, *Inorg. Synth.*, 1979, XIX, 218. [↑](#endnote-ref-3)
3. J. Plesek, T. Jelínek, F. Mares, S. Hermánek, *Collect. Czech. Chem. Commun*., 1993, **58**, 1534. [↑](#endnote-ref-4)
